# Supplementary material for: More than one landslide per road kilometer – surveying and modeling mass movements along the Rishikesh-Joshimath (NH-7) highway, Uttarakhand, India
Source: Copernicus journal article supplement (doi:10.5194/egusphere-2023-1975), 2023-10-27
Supplement: Supplementary file [file egusphere-2023-1975-AC1-supplement.pdf]

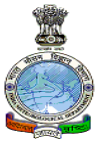

DISTRICT - WEEK BY WEEK DEPARTURES

Period :01-10-2022 To 07-12-2022

| S NO. | MET. SUBDIVISION/UT/ STATE/DISTRICT        | Week End 5-10-2022 | Week End 12-10-2022 | Week End 19-10-2022 | Week End 26-10-2022 | Week End 2-11-2022 | Week End 9-11-2022 | Week End 16-11-2022 | Week End 23-11-2022 | Week End 30-11-2022 | Week End 7-12-2022 |
|-------|--------------------------------------------|--------------------|---------------------|---------------------|---------------------|--------------------|--------------------|---------------------|---------------------|---------------------|--------------------|
|       | <b>SUBDIVISION : A &amp; N ISLAND</b>      |                    |                     |                     |                     |                    |                    |                     |                     |                     |                    |
| 1     | NICOBAR                                    | -27                | -12                 | 27                  | 149                 | -42                | -32                | 37                  | -56                 | -66                 | 25                 |
| 2     | NORTH & MIDDLE ANDAMAN                     | 42                 | 0                   | -18                 | 51                  | 24                 | -70                | -34                 | 156                 | 132                 | 374                |
| 3     | SOUTH ANDAMAN                              | -29                | -28                 | 51                  | 5                   | -32                | -58                | -69                 | -6                  | -72                 | 44                 |
|       | <b>SUBDIVISION : ARUNACHAL PRADESH</b>     |                    |                     |                     |                     |                    |                    |                     |                     |                     |                    |
| 1     | ANJAW                                      | -74                | 55                  | -68                 | 215                 | -100               | -100               | -100                | -100                | -100                | -100               |
| 2     | CHANGLANG                                  | -52                | 6                   | 88                  | 513                 | -58                | -100               | -100                | -100                | -100                | -100               |
| 3     | DIBANG VALLEY                              | -100               |                     |                     | -100                | -100               |                    |                     |                     |                     |                    |
| 4     | EAST KAMENG                                | -55                | 363                 | -83                 | 123                 | -100               | -100               | -100                | -100                | -100                | -100               |
| 5     | EAST SIANG                                 | -76                | 807                 | 164                 | 111                 | 143                | -100               | -100                | -100                | -100                | -100               |
| 6     | KURUNG KUMEY                               | 71                 | 49                  | -15                 | 470                 | 344                | -100               | -100                | -89                 | -100                | -100               |
| 7     | LOHIT                                      | -93                | 28                  | -57                 | 51                  | -60                | -100               | -100                | -100                | -100                | -100               |
| 8     | LOWER DIBANG VALLEY                        | -80                | 541                 | 72                  | 120                 | 5                  | -100               | -100                | -100                | -100                | -100               |
| 9     | LOWER SUBANSIRI                            | -13                | -8                  | -98                 | 136                 | -95                | -100               | -88                 | -93                 | -100                | -100               |
| 10    | PAPUM-PARE                                 | -27                | 597                 | -45                 | 271                 | -98                | -100               | -100                | -100                | -100                | -100               |
| 11    | TAWANG                                     | 40                 | 88                  | 55                  | 277                 | -79                | -100               | -78                 | -99                 | -100                | -100               |
| 12    | TIRAP                                      | -100               | -100                |                     | 183                 | -57                | -100               | -100                | -100                | -100                | -100               |
| 13    | UPPER SIANG                                | -62                | 394                 | 42                  | 181                 | -19                | -100               | -59                 | -100                | -100                | -100               |
| 14    | UPPER SUBANSIRI                            | -81                | -24                 | -100                | 8                   | 153                | -62                | -100                | -100                | -100                | -100               |
| 15    | WEST KAMENG                                | 5                  | 147                 | -95                 | 392                 | -66                | -96                | -100                | -100                | -100                | -100               |
| 16    | WEST SIANG                                 | -68                | 211                 | -71                 | 234                 | 347                | -100               | -86                 | -100                | -100                | -100               |
|       | <b>SUBDIVISION : ASSAM &amp; MEGHALAYA</b> |                    |                     |                     |                     |                    |                    |                     |                     |                     |                    |
|       | <b>STATE : ASSAM</b>                       |                    |                     |                     |                     |                    |                    |                     |                     |                     |                    |
| 1     | BAKSA                                      | -23                | 225                 | -37                 | 430                 | -100               | -100               | -100                | -100                | -100                | -100               |
| 2     | BARPETA                                    | -77                | 146                 | 60                  | 286                 | -35                | -100               | -100                | -100                | -100                | -100               |
| 3     | BONGAIGAON                                 | -88                | 148                 | -13                 | 70                  | -49                | -100               | -100                | -100                | -100                | -100               |
| 4     | CACHAR                                     | -26                | -29                 | -65                 | 10                  | -100               | -95                | -100                | -100                | -100                | -100               |
| 5     | CHIRANG                                    | -64                | 78                  | 45                  | 184                 | 1                  | -100               | -100                | -100                | -100                | -100               |
| 6     | DARRANG                                    | 61                 | 68                  | -52                 | 148                 | -100               | -100               | -100                | -100                | -100                | -100               |
| 7     | DHEMAJI                                    | -39                | 770                 | -77                 | 64                  | -86                | -100               | -100                | -100                | -100                | -100               |
| 8     | DHUBRI                                     | -95                | 208                 | 86                  | 38                  | -100               | -100               | -100                | -100                | -100                | -100               |
| 9     | DIBRUGARH                                  | -11                | 208                 | 53                  | 84                  | -94                | -100               | -100                | -100                | -100                | -100               |
| 10    | GOALPARA                                   | -83                | 167                 | 37                  | 264                 | -100               | -100               | -100                | -100                | -100                | -100               |
| 11    | GOLAGHAT                                   | 52                 | 65                  | -18                 | 158                 | -98                | -100               | -100                | -100                | -100                | -100               |
| 12    | HAILAKANDI                                 | 39                 | -46                 | -7                  | 45                  | -100               | -100               | -100                | -100                | -77                 | -100               |
| 13    | JORHAT                                     | 99                 | 292                 | -31                 | 263                 | -100               | -100               | -100                | -100                | -100                | -100               |
| 14    | KAMRUP METRO                               | 52                 | -10                 | -10                 | 234                 | -87                | -100               | -100                | -100                | -100                | -100               |
| 15    | KAMRUP RURAL                               | 12                 | -48                 | -22                 | 409                 | -100               | -100               | -100                | -100                | -100                | -100               |
| 16    | KARBI ANALOG                               | 67                 | 37                  | 6                   | 150                 | -100               | -100               | -100                | -100                | -100                | -100               |
| 17    | KARIMGANJ                                  | -69                | 106                 | -44                 | 114                 | -100               | -100               | -100                | -100                | -100                | -100               |
| 18    | KOKRAJHAR                                  | -77                | 416                 | -2                  | 195                 | -97                | -100               | -100                | -100                | -100                | -100               |
| 19    | LAKHIMPUR                                  | -17                | 851                 | -33                 | 172                 | -44                | -100               | -100                | -100                | -100                | -100               |
| 20    | MORIGAON                                   | 25                 | 53                  | -96                 | 200                 | -100               | -72                | -100                | -100                | -100                | -100               |

|                       |                        |     |      |      |     |      |      |      |      |      |       |
|-----------------------|------------------------|-----|------|------|-----|------|------|------|------|------|-------|
| 21                    | N.C HILLS              | -54 | -70  | -77  | 163 | -100 | -100 | -100 | -100 | -100 | -100  |
| 22                    | NAGAON                 | 5   | 6    | -70  | 138 | -90  | -100 | -100 | -100 | -100 | -100  |
| 23                    | NALBARI                | -47 | 48   | -10  | 462 | -86  | -100 | -100 | -100 | -100 | -100  |
| 24                    | SIBSAGAR               | 45  | 32   | -9   | 62  | -100 | -100 | -100 | -100 | -100 | -100  |
| 25                    | SONITPUR               | 81  | 45   | -67  | 196 | -100 | -100 | -100 | -100 | -100 | -100  |
| 26                    | TINSUKIA               | -64 | 73   | -48  | 100 | -71  | -99  | -100 | -100 | -100 | -100  |
| 27                    | UDALGURI               | 34  | 25   | -67  | 346 | -93  | -100 | -100 | -100 | -100 | -100  |
| STATE : MEGHALAYA     |                        |     |      |      |     |      |      |      |      |      |       |
| 1                     | EAST GARO HILLS        | -47 | 319  | 46   | 452 | -100 | -100 | -100 | -100 | -100 | -100  |
| 2                     | EAST JAINTIA HILLS     | -19 | -46  | -87  | 274 | -100 | -100 | -100 | -100 | -100 | -100  |
| 3                     | EAST KHASI HILLS       | -22 | 3    | -22  | 309 | -99  | -96  | -100 | -100 | -100 | -100  |
| 4                     | NORTH GARO HILLS       | -80 | 50   | -95  | 124 | -100 | -100 | -100 | -100 | -100 | -100  |
| 5                     | RI BHOI                | -41 | -73  | -50  | 372 | -99  | -41  | -100 | -100 | -100 | -100  |
| 6                     | SOUTH GARO HILLS       | 9   | -42  | 138  | 269 | -84  | -100 | -100 | -100 | -100 | -100  |
| 7                     | SOUTH WEST GARO HILLS  | 116 | 71   | -100 | 7   | -100 | -100 | -100 | -100 | -100 | -100  |
| 8                     | SOUTH WEST KHASI HILLS | 44  | 58   | 285  | 555 | -95  | -100 | -100 | -100 | -100 | -100  |
| 9                     | WEST GARO HILLS        | -47 | 226  | 60   | 151 | -100 | -100 | -100 | -100 | -100 | -100  |
| 10                    | WEST JAINTIA HILLS     | -89 | -89  | -92  | 319 | -78  | -88  | -100 | -100 | -100 | -100  |
| 11                    | WEST KHASI HILLS       | -8  | 12   | -60  | 291 | -99  | -100 | -100 | -100 | -100 | -100  |
| SUBDIVISION : N M M T |                        |     |      |      |     |      |      |      |      |      |       |
| STATE : NAGALAND      |                        |     |      |      |     |      |      |      |      |      |       |
| 1                     | DIMAPUR                | -48 | -72  | -14  | 122 | -98  | -3   | -100 | -100 | -100 | -100  |
| 2                     | KIPHIRE                | -75 | 10   | -69  | 201 | -100 | -100 | -100 | -100 | -100 | -100  |
| 3                     | KOHIMA                 | -22 | -87  | -84  | 87  | -100 | -100 | -100 | -100 | -100 | -100  |
| 4                     | LONGLENG               | -51 | -32  | -73  | 19  | -52  | -100 | -100 | -100 | -100 | -100  |
| 5                     | MOKOKCHUNG             | -17 | -42  | -59  | -3  | 27   | -100 | -100 | -100 | -100 | -100  |
| 6                     | MON                    |     |      |      |     |      |      |      |      |      |       |
| 7                     | PEREN                  | -84 | -91  | 87   | 62  | -100 | -100 | -100 | -100 | -100 | -100  |
| 8                     | PHEK                   | -19 | -30  | 4    | 274 | -100 | -100 | -100 | -100 | -100 | -100  |
| 9                     | TUENSANG               | -5  | -11  | -39  | -38 | -100 | -100 | -100 | -100 | -100 | -100  |
| 10                    | WOKHA                  | -36 | -38  | 79   | 59  | -83  | -100 | -100 | -100 | -100 |       |
| 11                    | ZUNHEBOTO              | 103 | 49   | 41   | 701 | -100 | -100 | -100 | -100 | -100 | -100  |
| STATE : MANIPUR       |                        |     |      |      |     |      |      |      |      |      |       |
| 1                     | BISHNUPUR              | 112 | -100 | -86  | 266 | -100 | -100 | -100 | -100 | -71  | -100  |
| 2                     | CHANDEL                | 155 | -78  | 18   | 229 | -100 | -100 | -100 | -100 | -70  | -100  |
| 3                     | CHURACHANDPUR          | 65  | -92  | -65  | 152 | -100 | -100 | -100 | -100 | -50  | 200   |
| 4                     | IMPHAL EAST            | 42  | -100 | -99  | 180 | -100 | -97  | -100 | -100 | -100 | -100  |
| 5                     | IMPHAL WEST            | 22  | -100 | -6   | 226 | -99  | -100 | -100 | -100 | -100 | -100  |
| 6                     | SENAPATI               | -60 | -95  | -1   | 287 | -97  | -100 | -100 | -100 | -100 | 9900  |
| 7                     | TAMENGLONG             | 2   | 27   | -88  | 51  | -99  | -100 | -100 | -100 | -100 | -100  |
| 8                     | THOUBAL                | 12  | -84  | -99  | 143 | -90  | -100 | -100 | -100 | -100 | 19    |
| 9                     | UKHRUL                 | 154 | -88  | 35   | 321 | -100 | -100 | -100 | -100 | -100 | -100  |
| STATE : MIZORAM       |                        |     |      |      |     |      |      |      |      |      |       |
| 1                     | AIZAWL                 | 10  | -84  | -33  | -19 | -100 | -100 | -100 | -100 | -85  | -100  |
| 2                     | CHAMPHAI               | 18  | -86  | -52  | -23 | -100 | -100 | -100 | -100 | -100 | 360   |
| 3                     | KOLASIB                | -16 | -65  | 30   | 48  | -100 | -92  | -100 | -100 | -59  | 10000 |
| 4                     | LAWNGTLAI              | -16 | 4    | -2   | -46 | -100 | -95  | -100 | -100 | -100 | 3400  |
| 5                     | LUNGLEI                | -61 |      | -3   | 52  | -100 | -100 | -100 | -100 | -100 | 850   |
| 6                     | MAMIT                  | -50 | -90  | -9   | 153 | -100 | -88  | -100 | -100 | -100 | -100  |
| 7                     | SAIHA                  | 4   | 35   | 51   | 16  | -100 | -100 | -100 | -100 | -100 | -100  |
| 8                     | SERCHHIP               | -63 | -53  | -19  | 173 | -100 | -97  | -100 | -100 | -81  | -100  |
| STATE : TRIPURA       |                        |     |      |      |     |      |      |      |      |      |       |
| 1                     | DHALAI                 | 293 | -64  | -2   | 133 | -100 | -100 | -100 | -100 | -100 | -100  |
| 2                     | GOMATI                 | 171 | -38  | -34  | 189 | -100 | -100 | -100 | -100 | -100 | -100  |
| 3                     | KHOWAI                 | -17 | 75   | -77  | -45 | -100 | -100 | -100 | -100 | -100 | -100  |
| 4                     | NORTH TRIPURA          | 181 | -22  | -39  | 99  | -100 | -100 | -100 | -100 | -100 | -100  |



|    |                                |     |     |      |      |      |      |      |      |      |      |
|----|--------------------------------|-----|-----|------|------|------|------|------|------|------|------|
| 24 | NAYAGARH                       | 59  | 83  | 12   | -100 | -100 | -100 | -100 | -100 | -100 | -100 |
| 25 | NUAPARHA                       | 22  | 16  | -15  | -100 | -100 | -100 | -100 | -100 | -100 | -100 |
| 26 | PURI                           | 155 | 36  | -77  | -100 | -100 | -100 | -100 | -100 | -100 | -100 |
| 27 | RAYAGARHA                      | 59  | 4   | -3   | -99  | -100 | -21  | -100 | -100 | -100 | -100 |
| 28 | SAMBALPUR                      | 195 | 33  | 65   | -100 | -100 | -100 | -100 | -100 | -100 | -100 |
| 29 | SUBARNAPUR                     | 80  | -36 | 23   | -100 | -100 | -100 | -100 | -100 | -100 | -100 |
| 30 | SUNDARGARH                     | 148 | 7   | 132  | -99  | -100 | -100 | -100 | -100 | -100 | -100 |
|    | <b>SUBDIVISION : JHARKHAND</b> |     |     |      |      |      |      |      |      |      |      |
| 1  | BOKARO                         | 149 | 7   | -58  | -94  | -100 | -100 | -100 | -100 | -100 | -100 |
| 2  | CHATRA                         | 108 | 25  | -23  | -100 | -100 | -100 | -100 | -100 | -100 | -100 |
| 3  | DEOGHAR                        | 16  | 65  | -40  | -97  | -100 | -100 | -100 | -100 | -100 | -100 |
| 4  | DHANBAD                        | 18  | 23  | -28  | -89  | -100 | -100 | -100 | -100 | -100 | -100 |
| 5  | DUMKA                          | 79  | 48  | -12  | -100 | -100 | -100 | -100 | -100 | -100 | -100 |
| 6  | EAST SINGHBHUM                 | 77  | 208 | 132  | -86  | -100 | -100 | -100 | -100 | -100 | -100 |
| 7  | GARHWA                         | 447 | 74  | -19  | -100 | -100 | -100 | -100 | -100 | -100 | -100 |
| 8  | GIRIDIH                        | 220 | 10  | -67  | -90  | -100 | -100 | -100 | -100 | -100 | -100 |
| 9  | GODDA                          | -27 | 162 | -98  | -100 | -100 | -100 | -100 | -100 | -100 | -100 |
| 10 | GUMLA                          | 62  | -64 | 196  | -99  | -100 | -100 | -100 | -100 | -100 | -100 |
| 11 | HAZARIBAGH                     | 197 | 33  | 0    | -99  | -100 | -100 | -100 | -100 | -100 | -100 |
| 12 | JAMTARA                        | -17 | -25 | -73  | -100 | -100 | -100 | -100 | -100 | -100 | -100 |
| 13 | KHUNTI                         | -34 | -52 | 85   | -100 | -100 | -100 | -100 | -100 | -100 | -100 |
| 14 | KODERMA                        | 184 | 110 | -54  | -36  | -100 | -100 | -100 | -100 | -100 | -100 |
| 15 | LATEHAR                        | 39  | 59  | 18   | -100 | -100 | -100 | -100 | -100 | -100 | -100 |
| 16 | LOHARDAGA                      | 47  | -47 | 244  | -100 | -100 | -100 | -100 | -100 | -100 | -100 |
| 17 | PAKUR                          | -4  | -32 | -81  | -100 | -100 | -100 | -100 | -100 | -100 | -100 |
| 18 | PALAMU                         | 178 | -4  | -24  | -100 | -100 | -100 | -100 | -100 | -100 | -100 |
| 19 | RAMGARH                        | 138 | -40 | 19   | -100 | -100 | -100 | -100 | -100 | -100 | -100 |
| 20 | RANCHI                         | 207 | 4   | 28   | -100 | -100 | -100 | -100 | -100 | -100 | -100 |
| 21 | SAHEBGANJ                      | 85  | -50 | -77  | -100 | -100 | -100 | -100 | -100 | -100 | -100 |
| 22 | SARAIKELA                      | 99  | 100 | 111  | -96  | -100 | -100 | -100 | -100 | -100 | -100 |
| 23 | SIMDEGA                        | 11  | 7   | 260  | -100 | -100 | -100 | -100 | -100 | -100 | -100 |
| 24 | WEST SINGHBHUM                 | -22 | 41  | 89   | -97  | -100 | -100 | -100 | -100 | -100 | -100 |
|    | <b>SUBDIVISION : BIHAR</b>     |     |     |      |      |      |      |      |      |      |      |
| 1  | ARARIYA                        | 114 | 135 | -71  | -100 | -100 | -100 | -100 | -100 | -100 | -100 |
| 2  | ARWAL                          | 127 | 84  | -100 | -100 | -100 | -100 | -100 | -100 | -100 | -100 |
| 3  | AURANGABAD                     | 191 | -1  | -95  | -100 | -100 | -100 | -100 | -100 | -100 | -100 |
| 4  | BANKA                          | 72  | 109 | -52  | -71  | -100 | -100 | -100 | -100 | -100 | -100 |
| 5  | BEGUSARAI                      | 274 | 104 | -81  | -100 | -100 | -100 | -100 | -100 | -100 | -100 |
| 6  | BHABUA                         | 68  | 105 | -96  | -100 | -100 | -100 | -100 | -100 | -100 | -100 |
| 7  | BHAGALPUR                      | 61  | 33  | -68  | -85  | -100 | -100 | -100 | -100 | -100 | -100 |
| 8  | BHOJPUR                        | 18  | 297 | -100 | -100 | -100 | -100 | -100 | -100 | -100 | -100 |
| 9  | BUXAR                          | 44  | 112 | -100 | -100 | -100 | -100 | -100 | -100 | -100 | -100 |
| 10 | DRABHANGA                      | 76  | 90  | -90  | -100 | -100 | -100 | -100 | -100 | -100 | -100 |
| 11 | GAYA                           | 56  | 64  | -84  | -100 | -100 | -100 | -100 | -100 | -100 | -100 |
| 12 | GOPALGANJ                      | -39 | 393 | -100 | -100 | -100 | -100 | -100 | -100 | -100 | -100 |
| 13 | JAHANABAD                      | 109 | 88  | -100 | -100 | -100 | -100 | -100 | -100 | -100 | -100 |
| 14 | JAMUI                          | 118 | 61  | -98  | -65  | -100 | -100 | -100 | -100 | -100 | -100 |
| 15 | KATI HAR                       | 107 | -31 | -52  | -100 | -100 | -100 | -100 | -100 | -100 | -100 |
| 16 | KHAGARIA                       | 174 | 180 | -91  | -89  | -100 | -100 | -100 | -100 | -100 | -100 |
| 17 | KISHANGANJ                     | 47  | 193 | -20  | -100 | -100 | -100 | -100 | -100 | -100 | -100 |
| 18 | LAKHISARAI                     | 141 | 124 | -70  | 392  | -100 | -100 | -100 | -100 | -100 | -100 |
| 19 | MADHEPURA                      | 96  | 15  | -54  | -100 | -100 | -100 | -100 | -100 | -100 | -100 |
| 20 | MADUBANI                       | -4  | 41  | -100 | -100 | -100 | -100 | -100 | -100 | -100 | -100 |
| 21 | MUNGER                         | 118 | 132 | -78  | -73  | -100 | -100 | -100 | -100 | -100 | -100 |
| 22 | MUZAFFARPUR                    | -41 | 131 | -100 | -82  | -100 | -100 | -100 | -100 | -100 | -100 |







|                                          |                |      |      |      |      |      |      |      |      |      |      |
|------------------------------------------|----------------|------|------|------|------|------|------|------|------|------|------|
| 21                                       | SBS NAGAR      | -100 | 1240 | -100 | -100 | -100 | -100 | 22   | -100 | -100 | -100 |
| 22                                       | TARN TARAN     | -100 | -97  | -100 | -100 | -100 | -100 | -22  | -100 | -100 | -100 |
| SUBDIVISION : HIMACHAL PRADESH           |                |      |      |      |      |      |      |      |      |      |      |
| 1                                        | BILASPUR       | -97  | 1461 | 98   | -100 | -100 | -100 | -61  | -100 | -100 | -100 |
| 2                                        | CHAMBA         | -94  | 169  | -64  | 195  | -100 | -51  | 772  | -100 | -100 | -100 |
| 3                                        | HAMIRPUR       | -100 | 117  | -100 | -62  | -100 | -100 | -31  | -100 | -100 | -100 |
| 4                                        | KANGRA         | -89  | 410  | -99  | 116  | -100 | -99  | 227  | -100 | -100 | -100 |
| 5                                        | KINNAUR        | -70  | 91   | -92  | -100 | -100 | -100 | 358  | -100 | -100 | -100 |
| 6                                        | KULLU          | -66  | 819  | -40  | -98  | -100 | -100 | 393  | -100 | -100 | -100 |
| 7                                        | LAHUL&SPITI    | -100 | -34  | -90  | 61   | -76  | -74  | 586  | -100 | -100 | -100 |
| 8                                        | MANDI          | -20  | 654  | -41  | -58  | -100 | -100 | 92   | -100 | -100 | -100 |
| 9                                        | SHIMLA         | 82   | 513  | -49  | -77  | -100 | -100 | 159  | -100 | -100 | -100 |
| 10                                       | SIRMAUR        | -81  | 628  | 12   | -100 | -100 | -100 | -93  | -100 | -100 | -100 |
| 11                                       | SOLAN          | -65  | 453  | -41  | -100 | -100 | -100 | -69  | -100 | -100 | -100 |
| 12                                       | UNA            | -100 | 90   | -100 | -100 | -100 | -98  | -100 | -100 | -100 | -100 |
| SUBDIVISION : JAMMU & KASHMIR AND LADAKH |                |      |      |      |      |      |      |      |      |      |      |
| STATE : JAMMU & KASHMIR (UT)             |                |      |      |      |      |      |      |      |      |      |      |
| 1                                        | ANANTNAG       | 32   | -79  | -59  | 137  | -60  | 194  | 79   | -99  | -100 | -100 |
| 2                                        | BADGAM         | -85  | -100 | -85  | 88   | -69  | 268  | 87   | -100 | -100 | -100 |
| 3                                        | BANDIPORE      | -43  | -100 | -100 | 31   | -89  | 186  | 200  | -80  | -100 | -100 |
| 4                                        | BARAMULA       | -69  | -100 | -84  | 105  | -70  | 447  | 485  | -97  | -100 | -100 |
| 5                                        | DODA           | -86  | -34  | -19  | 398  | -10  | 16   | 769  | -100 | -100 | -100 |
| 6                                        | GANDERWAL      | -65  | -90  | -93  | 403  | -79  | 142  | 89   | -84  | -100 | -100 |
| 7                                        | JAMMU          | -100 | 41   | -100 | -12  | -98  | 429  | 55   | -100 | -100 | -100 |
| 8                                        | KATHUA         | -100 | 13   | -100 | 876  | -100 | 160  | 23   | -100 | -100 | -100 |
| 9                                        | KISTWAR        | -77  | 158  | -58  | 445  | -71  | 107  | 733  | -100 | -100 | -100 |
| 10                                       | KULGAM         | 0    | -86  | -87  | 414  | -71  | 361  | -40  | -100 | -100 | -100 |
| 11                                       | KUPWARA        | -94  | -100 | -99  | 16   | -99  | 147  | 172  | -92  | -100 | -100 |
| 12                                       | PULWAMA        | -25  | -100 | -52  | 124  | -29  | 261  | -39  | -100 | -100 | -100 |
| 13                                       | PUNCH          | -100 | -100 | -100 | -100 | -100 | 1270 | 270  | -30  | -100 | -100 |
| 14                                       | RAJOURI        | 176  | 491  | -49  | 197  | -100 | 38   | 686  | -100 | -100 | -100 |
| 15                                       | RAMBAN         | -77  | 93   | -91  | 200  | -96  | 175  | 337  | -100 | -100 | -100 |
| 16                                       | RIASI          | -100 | 474  | -100 | 146  | -100 | 528  | 487  | -100 | -100 | -100 |
| 17                                       | SAMBA          | -100 | -100 | -100 | -76  | -100 | 61   | 4650 | -100 | -100 | -100 |
| 18                                       | SHOPIAN        | -72  | -100 | -86  | -55  | -91  | 71   | -12  | -100 | -100 | -100 |
| 19                                       | SRINAGAR       | -88  | -96  | -89  | 183  | -32  | 456  | 136  | -100 | -100 | -100 |
| 20                                       | UDHAMPUR       | -95  | 195  | -95  | 71   | -100 | 427  | 68   | -100 | -100 | -100 |
| STATE : LADAKH (UT)                      |                |      |      |      |      |      |      |      |      |      |      |
| 1                                        | KARGIL         | -100 | -100 | -100 | -100 | 7900 | -100 | 1050 | -100 | -100 | -100 |
| 2                                        | LEH AND LADAKH | -100 | -79  | 81   | -33  | -33  | -97  | 1667 | -42  | -100 | -100 |
| SUBDIVISION : WEST RAJASTHAN             |                |      |      |      |      |      |      |      |      |      |      |
| STATE : RAJASTHAN                        |                |      |      |      |      |      |      |      |      |      |      |
| 1                                        | BARMER         | -100 | -100 | -100 | -100 | -100 | -100 | -100 | -100 | -100 | -100 |
| 2                                        | BIKANER        | -100 | -100 | -100 | -100 | -100 | -75  | -50  | -100 | -100 | -100 |
| 3                                        | CHURU          | -93  | 405  | -100 | -100 | -100 | 31   | 71   | -100 | -100 | -100 |
| 4                                        | GANGANAGAR     | -100 | -100 | -100 | -100 | -100 | -20  | 67   | -100 | -100 | -100 |
| 5                                        | HANUMANGARH    | -100 | -100 | -100 | -100 | -100 | -78  | -100 | -100 | -100 | -100 |
| 6                                        | JAISELMER      | -100 | -100 | -100 | -100 | -100 | -100 | -100 | -100 | -100 | -100 |
| 7                                        | JALOR          | -100 | -83  | -100 | -100 | -100 | -100 | -100 | -100 | -100 | -100 |
| 8                                        | JODHPUR        | -63  | 62   | -100 | -100 | -100 | -100 | -100 | -100 | -100 | -100 |
| 9                                        | NAGAU          | -29  | 826  | -100 | -100 | -100 | 80   | -25  | -100 | -100 | -100 |
| 10                                       | PALI           | 31   | 235  | -100 | -100 | -100 | -100 | -100 | -100 | -100 | -100 |
| SUBDIVISION : EAST RAJASTHAN             |                |      |      |      |      |      |      |      |      |      |      |







|    |                                  |      |      |      |      |      |      |      |      |      |      |
|----|----------------------------------|------|------|------|------|------|------|------|------|------|------|
| 4  | DEVBHOOMI DWARKA                 | -100 | 56   | -100 | -100 | -100 | -100 | -100 | -100 | -100 | -100 |
| 5  | DIU                              | -100 | 227  | -100 | -100 | -100 | -100 | -100 | -100 | -100 | -100 |
| 6  | GIR SOMNATH                      | -100 | 294  | -41  | -100 | -100 | -100 | -100 | -100 | -100 | -100 |
| 7  | JAMNAGAR                         | -76  | -68  | -100 | -100 | -100 | -100 | -100 | -100 | -100 | -100 |
| 8  | JUNAGARH                         | -86  | 8    | -100 | -100 | -100 | -100 | -100 | -100 | -100 | -100 |
| 9  | KACHCHH                          | -71  | -100 | -100 | -100 | -100 | -67  | -100 | -100 | -100 | -100 |
| 10 | MORBI                            | -100 | -100 | -100 | -100 | -100 | -100 | -100 | -100 | -100 | -100 |
| 11 | PORBANDAR                        | -52  | -83  | -100 | -100 | -100 | -100 | -100 | -100 | -100 | -100 |
| 12 | RAJKOT                           | -95  | -15  | -87  | -100 | -100 | -100 | -100 | -100 | -100 | -100 |
| 13 | SURENDRANAGAR                    | -97  | -100 | -100 | -100 | -100 | -100 | -100 | -100 | -100 | -100 |
|    | SUBDIVISION : KONKAN & GOA       |      |      |      |      |      |      |      |      |      |      |
|    | STATE : GOA                      |      |      |      |      |      |      |      |      |      |      |
| 1  | NORTH GOA                        | -93  | -48  | 131  | 6    | -100 | -99  | -100 | -100 | 109  | -100 |
| 2  | SOUTH GOA                        | -67  | -61  | -37  | 23   | -100 | -30  | -100 | -100 | 272  | -100 |
|    | STATE : MAHARASHTRA              |      |      |      |      |      |      |      |      |      |      |
| 1  | MUMBAI CITY                      | -37  | 232  | -27  | -100 | -100 | -100 | -100 | -100 | -100 | -100 |
| 2  | PALGHAR                          | -59  | 143  | 288  | -57  | -100 | -100 | -100 | -100 | -100 | -100 |
| 3  | RAIGARH                          | -58  | 217  | 143  | -5   | -100 | -100 | -100 | -100 | -100 | -100 |
| 4  | RATNAGIRI                        | -68  | 66   | 152  | 37   | -100 | -100 | -100 | -100 | -100 | -100 |
| 5  | SINDHUDURG                       | -24  | 48   | 236  | -61  | -100 | -94  | -100 | -100 | 495  | -100 |
| 6  | SUBURBAN MUMBAI                  | -73  | 362  | 652  | 34   | -100 | -100 | -100 | -100 | -100 | -100 |
| 7  | THANE                            | -47  | 236  | 506  | -54  | -100 | -100 | -100 | -100 | -100 | -100 |
|    | SUBDIVISION : MADHYA MAHARASHTRA |      |      |      |      |      |      |      |      |      |      |
| 1  | AHMADNAGAR                       | -50  | 157  | 477  | 294  | -100 | -100 | -100 | -100 | -100 | -100 |
| 2  | DHULE                            | -15  | 468  | -12  | -100 | -100 | -100 | -100 | -100 | -100 | -100 |
| 3  | JALGAON                          | -90  | 409  | 216  | 61   | -100 | -100 | -100 | -100 | -100 | -100 |
| 4  | KOLHAPUR                         | -26  | 156  | 370  | 114  | -100 | -100 | -100 | -100 | 181  | -100 |
| 5  | NANDURBAR                        | -90  | 303  | 288  | -100 | -100 | -100 | -100 | -100 | -100 | -100 |
| 6  | NASIK                            | -21  | 112  | 238  | 281  | -100 | -100 | -100 | -100 | -100 | -64  |
| 7  | PUNE                             | -54  | 51   | 460  | 115  | -100 | -100 | -100 | -100 | -100 | -100 |
| 8  | SANGLI                           | -25  | 116  | 127  | 150  | -100 | -100 | -100 | -100 | -84  | 43   |
| 9  | SATARA                           | -50  | 156  | 549  | -20  | -100 | -100 | -100 | -100 | -82  | -100 |
| 10 | SOLAPUR                          | -67  | 92   | 249  | 124  | -100 | -100 | -100 | -100 | -100 | -100 |
|    | SUBDIVISION : MARATHWADA         |      |      |      |      |      |      |      |      |      |      |
| 1  | AURANGABAD                       | -87  | 256  | 467  | 47   | -100 | -100 | -100 | -100 | -100 | -100 |
| 2  | BID                              | -67  | 137  | 373  | 182  | -100 | -100 | -100 | -100 | -100 | -100 |
| 3  | HINGOLI                          | -82  | 282  | 89   | -26  | -100 | -100 | -100 | -100 | -100 | -100 |
| 4  | JALNA                            | -45  | 70   | 324  | -37  | -100 | -100 | -100 | -100 | -100 | -100 |
| 5  | LATUR                            | -71  | 200  | 184  | 84   | -100 | -100 | -100 | -100 | -100 | -100 |
| 6  | NANDED                           | -71  | 161  | 117  | -79  | -100 | -100 | -100 | -100 | -100 | -100 |
| 7  | OSMANABAD                        | -77  | 137  | 334  | 239  | -100 | -100 | -100 | -100 | -100 | -100 |
| 8  | PARBHANI                         | -47  | 98   | 303  | -5   | -100 | -100 | -100 | -100 | -100 | -100 |
|    | SUBDIVISION : VIDARBHA           |      |      |      |      |      |      |      |      |      |      |
| 1  | AKOLA                            | -75  | 388  | 113  | -76  | -100 | -100 | -100 | -100 | -100 | -100 |
| 2  | AMARAVATI                        | -89  | 305  | 137  | -99  | -100 | -100 | -100 | -100 | -100 | -100 |
| 3  | BHANDARA                         | 4    | 501  | 30   | -100 | -100 | -100 | -100 | -100 | -100 | -100 |
| 4  | BULDHANA                         | -89  | 187  | 374  | 40   | -100 | -100 | -100 | -100 | -100 | -100 |
| 5  | CHANDRAPUR                       | -92  | -10  | 103  | -89  | -100 | -100 | -100 | -100 | -100 | -100 |
| 6  | GADCHIROLI                       | -20  | 76   | 51   | -94  | -100 | -100 | -100 | -100 | -100 | -100 |
| 7  | GONDIYA                          | 26   | 366  | 62   | -98  | -99  | -100 | -100 | -100 | -100 | -100 |
| 8  | NAGPUR                           | -85  | 276  | 372  | -98  | -99  | -100 | -100 | -100 | -100 | -100 |
| 9  | WARDHA                           | -90  | 204  | 196  | -87  | -99  | -100 | -100 | -100 | -100 | -100 |
| 10 | WASHIM                           | -98  | 377  | 133  | -44  | -100 | -100 | -100 | -100 | -100 | -100 |
| 11 | YAVATMAL                         | -76  | 350  | 141  | -98  | -99  | -100 | -100 | -100 | -100 | -100 |

|    |                                       |     |     |     |      |      |      |      |      |      |      |
|----|---------------------------------------|-----|-----|-----|------|------|------|------|------|------|------|
|    | SUBDIVISION :<br>CHHATTISGARH         |     |     |     |      |      |      |      |      |      |      |
| 1  | BALARAMPUR                            | 246 | 154 | 517 | -100 | -100 | -100 | -100 | -100 | -100 | -100 |
| 2  | BALOD                                 | -21 | 116 | 42  | -100 | -100 | -100 | -100 | -100 | -100 | -100 |
| 3  | BALODA BAZAR                          | 111 | 99  | 189 | -100 | -100 | -100 | -100 | -100 | -100 | -100 |
| 4  | BASTAR                                | 62  | -27 | 217 | -93  | -100 | -100 | -100 | -100 | -100 | -100 |
| 5  | BEMETARA                              | -24 | 6   | 243 | -100 | -100 | -100 | -100 | -100 | -100 | -100 |
| 6  | BIJAPUR                               | -30 | 42  | 19  | -53  | -100 | -100 | -100 | -100 | -100 | -100 |
| 7  | BILASPUR                              | 80  | 113 | 105 | -100 | -100 | -100 | -100 | -100 | -100 | -100 |
| 8  | DANTEWARA                             | -52 | 31  | -31 | -65  | -100 | -100 | -100 | -100 | -100 | -100 |
| 9  | DHMTARI                               | -11 | 167 | 26  | -100 | -100 | -100 | -100 | -100 | -100 | -100 |
| 10 | DURG                                  | -14 | 282 | 518 | -100 | -100 | -100 | -100 | -100 | -100 | -100 |
| 11 | GARIABAND                             | 37  | 53  | 139 | -96  | -100 | -100 | -100 | -100 | -100 | -100 |
| 12 | JANJGIR_CHAMPA                        | 101 | 74  | 22  | -100 | -100 | -100 | -100 | -100 | -100 | -100 |
| 13 | JASHPUR                               | 100 | 65  | 415 | -100 | -100 | -100 | -100 | -100 | -100 | -100 |
| 14 | KABIRDHAM                             | -44 | 172 | 167 | -100 | -100 | -100 | -100 | -100 | -100 | -100 |
| 15 | KANKER                                | -31 | 173 | 42  | -97  | -100 | -100 | -100 | -100 | -100 | -100 |
| 16 | KONDAGAON                             | -39 | 9   | 137 | -94  | -100 | -100 | -100 | -100 | -100 | -100 |
| 17 | KORBA                                 | 68  | 36  | 134 | -100 | -100 | -100 | -100 | -100 | -100 | -100 |
| 18 | KOREA                                 | -20 | 261 | 15  | -100 | -100 | -100 | -100 | -100 | -100 | -100 |
| 19 | MAHASAMUND                            | 41  | -23 | 40  | -100 | -100 | -100 | -100 | -100 | -100 | -100 |
| 20 | MUNGELI                               | 151 | 305 | 330 | -100 | -100 | -100 | -100 | -100 | -100 | -100 |
| 21 | NARAYANPUR                            | -36 | -15 | 136 | -50  | -100 | -100 | -100 | -100 | -100 | -100 |
| 22 | RAIGARH                               | 169 | -2  | 97  | -100 | -100 | -100 | -100 | -100 | -100 | -100 |
| 23 | RAIPUR                                | 82  | 122 | 149 | -100 | -100 | -100 | -100 | -100 | -100 | -100 |
| 24 | RAJNANDGAON                           | -1  | 114 | 118 | -100 | -100 | -100 | -100 | -100 | -100 | -100 |
| 25 | SUKMA                                 | 53  | -47 | -13 | -88  | -100 | -100 | -100 | -100 | -100 | -100 |
| 26 | SURAJPUR                              | 80  | 44  | 275 | -100 | -100 | -100 | -100 | -100 | -100 | -100 |
| 27 | SURGUJA                               | 24  | -6  | 238 | -100 | -100 | -100 | -100 | -100 | -100 | -100 |
|    | SUBDIVISION : COASTAL<br>AP and YANAM |     |     |     |      |      |      |      |      |      |      |
| 1  | YANAM                                 | -59 | 53  | 249 | -94  | -100 | -45  | -100 | 24   | -91  | -100 |
|    | STATE : ANDHRA<br>PRADESH             |     |     |     |      |      |      |      |      |      |      |
| 1  | EAST GODAVARI                         | -44 | 115 | 108 | -97  | -99  | -73  | -100 | -60  | -88  | -97  |
| 2  | GUNTUR                                | 47  | 257 | 272 | -95  | -79  | -61  | -87  | -73  | -59  | -100 |
| 3  | KRISHNA                               | -34 | 167 | 128 | -82  | -89  | -74  | -92  | -60  | -78  | -97  |
| 4  | PRAKASAM                              | 72  | 197 | -26 | -75  | -52  | -90  | -18  | -78  | -85  | -100 |
| 5  | SPSR NELLORE                          | -26 | 34  | -74 | -85  | -16  | -69  | 62   | -40  | -25  | -92  |
| 6  | SRIKAKULAM                            | 55  | 99  | -56 | -98  | -100 | -100 | -100 | -99  | -74  | -100 |
| 7  | VISHAKHAPATNAM                        | -6  | 127 | 26  | -92  | -99  | -84  | -100 | -99  | 59   | 103  |
| 8  | VIZIANAGARAM                          | 44  | 210 | 31  | -100 | -100 | -95  | -100 | -100 | -18  | -100 |
| 9  | WEST GODAVARI                         | -39 | 159 | 128 | -66  | -99  | -75  | -100 | -53  | -73  | -30  |
|    | SUBDIVISION :<br>TELANGANA            |     |     |     |      |      |      |      |      |      |      |
| 1  | ADILABAD                              | -70 | 182 | 152 | -95  | -100 | -100 | -100 | -100 | -100 | -100 |
| 2  | B. KOTHAGUDEM                         | -42 | 173 | 114 | -79  | -100 | -100 | -100 | -97  | -100 | -100 |
| 3  | HANUMAKONDA                           | -50 | 82  | 65  | 142  | -100 | -100 | -100 | -100 | -100 | -100 |
| 4  | HYDERABAD                             | -38 | 120 | 136 | -100 | -98  | -100 | -100 | -100 | -100 | -100 |
| 5  | J. BHUPALPALLY                        | -85 | 11  | 52  | -100 | -100 | -100 | -100 | -100 | -100 | -100 |
| 6  | JAGTIAL                               | -82 | 68  | -26 | -95  | -100 | -100 | -100 | -100 | -100 | -100 |
| 7  | JANGAON                               | 38  | 206 | 30  | 157  | -100 | -100 | -100 | -100 | 27   | -100 |
| 8  | JOGULAMBA GADWAL                      | 76  | 10  | 86  | -89  | -98  | -99  | -100 | -100 | -100 | -100 |
| 9  | KAMAREDDY                             | -58 | 80  | 138 | -47  | -99  | -100 | -100 | -100 | -100 | -100 |
| 10 | KARIMNAGAR                            | -57 | 125 | 224 | -76  | -99  | -100 | -100 | -100 | -100 | -100 |
| 11 | KHAMMAM                               | -8  | 72  | 51  | -95  | -100 | -89  | -100 | -56  | -96  | -100 |
| 12 | KUMARAM BHEEM                         | 47  | 94  | 79  | -70  | -100 | -100 | -99  | -100 | -100 | -100 |

|    |                                       |     |     |     |      |      |      |      |      |      |      |
|----|---------------------------------------|-----|-----|-----|------|------|------|------|------|------|------|
| 13 | M. MALKAJGIRI                         | -54 | 132 | 136 | -53  | -100 | -100 | -100 | -100 | -100 | -100 |
| 14 | MAHABUBABAD                           | 21  | 43  | 97  | -26  | -100 | -78  | -100 | -100 | -45  | -100 |
| 15 | MAHABUBNAGAR                          | 129 | 247 | 137 | 52   | -94  | -100 | -100 | -97  | -100 | -100 |
| 16 | MANCHERIAL                            | -42 | 39  | -5  | -100 | -99  | -100 | -100 | -100 | -100 | -100 |
| 17 | MEDAK                                 | -66 | 61  | 124 | -97  | -100 | -100 | -100 | -100 | -100 | -100 |
| 18 | MULUGU                                | 10  | 65  | 230 | -85  | -100 | -100 | -100 | -100 | -100 | -100 |
| 19 | NAGARKURNOOL                          | 57  | 135 | 55  | -69  | -95  | -100 | -100 | -96  | -100 | -100 |
| 20 | NALGONDA                              | 72  | 22  | 192 | -93  | -96  | -97  | -100 | -85  | -77  | -100 |
| 21 | NARAYANPET                            | 54  | 248 | -25 | 48   | -100 | -100 | -100 | -100 | -100 | -100 |
| 22 | NIRMAL                                | -77 | 98  | 38  | -85  | -100 | -100 | -100 | -100 | -100 | -100 |
| 23 | NIZAMABAD                             | -92 | 90  | 18  | -97  | -100 | -100 | -100 | -100 | -100 | -100 |
| 24 | PEDDAPALLE                            | -78 | 115 | 83  | -98  | -100 | -100 | -100 | -100 | -100 | -100 |
| 25 | RAJANNA SIRCILLA                      | -60 | 147 | 145 | -50  | -100 | -100 | -100 | -100 | -100 | -100 |
| 26 | RANGAREDDY                            | 16  | 66  | 115 | -56  | -92  | -100 | -100 | -98  | -100 | -100 |
| 27 | SANGAREDDY                            | -76 | 65  | 317 | -70  | -100 | -100 | -100 | -100 | -100 | -100 |
| 28 | SIDDIPET                              | -51 | 97  | 317 | -89  | -100 | -100 | -100 | -98  | -100 | -100 |
| 29 | SURYAPET                              | 61  | 39  | 172 | -99  | -100 | -66  | -100 | -62  | -91  | -100 |
| 30 | VIKARABAD                             | -3  | 275 | 88  | -24  | -99  | -100 | -100 | -95  | -100 | -100 |
| 31 | WANAPARTHY                            | 13  | 304 | 83  | -62  | -75  | -100 | -100 | -88  | -100 | -32  |
| 32 | WARANGAL                              | -56 | 167 | 129 | 108  | -100 | -100 | -100 | -100 | -100 | -100 |
| 33 | Y. BHUVANAGIRI                        | 65  | 6   | -16 | -63  | -94  | -100 | -100 | -100 | -100 | -100 |
|    | SUBDIVISION :<br>RAYALASEEMA          |     |     |     |      |      |      |      |      |      |      |
| 1  | ANANTAPURAMU                          | 48  | 97  | 346 | -92  | -75  | -35  | -34  | -52  | -52  | -100 |
| 2  | CHITTOOR                              | -66 | 61  | 35  | -66  | -18  | -64  | 42   | -39  | -50  | -94  |
| 3  | KURNOOL                               | 95  | 55  | 179 | -71  | -94  | -65  | -98  | -80  | -88  | -100 |
| 4  | YSR DISTRICT                          | 117 | 86  | 22  | -61  | -63  | -57  | 14   | -47  | -17  | -100 |
|    | SUBDIVISION : TN PUDU<br>and KARAICAL |     |     |     |      |      |      |      |      |      |      |
|    | STATE : TAMIL NADU                    |     |     |     |      |      |      |      |      |      |      |
| 1  | ARIYALUR                              | -69 | 4   | -3  | 36   | -60  | -57  | 45   | -100 | -98  | 31   |
| 2  | CHENGALPATTU                          | -79 | 92  | -57 | -60  | 27   | 24   | 142  | -96  | -90  | -85  |
| 3  | CHENNAI                               | -27 | 81  | -73 | -45  | 91   | 35   | 67   | -86  | -97  | -94  |
| 4  | COIMBATORE                            | -66 | 54  | 127 | 7    | -79  | -23  | 294  | -94  | 9    | -56  |
| 5  | CUDDALORE                             | -58 | -23 | 29  | -42  | -25  | 15   | 199  | -98  | -88  | -31  |
| 6  | DHARAMPURI                            | -76 | 11  | 255 | -64  | -33  | -27  | 92   | -98  | 24   | -81  |
| 7  | DINDIGUL                              | -71 | 109 | 109 | -6   | -86  | 35   | 214  | -100 | -92  | -9   |
| 8  | ERODE                                 | -45 | 200 | 295 | 78   | -92  | -39  | 293  | -100 | 83   | -17  |
| 9  | KALLAKURICHI                          | -91 | 35  | 36  | -63  | -53  | 8    | 108  | -100 | -71  | -64  |
| 10 | KANCHIPURAM                           | -80 | 246 | -73 | -70  | 63   | -7   | 150  | -95  | -53  | -86  |
| 11 | KANYAKUMARI                           | -72 | -91 | 159 | -34  | -34  | 61   | -5   | -83  | 21   | 129  |
| 12 | KARUR                                 | -76 | 139 | 6   | 0    | -76  | -12  | 203  | -100 | -98  | 7    |
| 13 | KRISHNAGIRI                           | -65 | 21  | 177 | -11  | -62  | -21  | 224  | -97  | 32   | -98  |
| 14 | MADURAI                               | -83 | 156 | 176 | 3    | -92  | 32   | 83   | -100 | -49  | 33   |
| 15 | MAYILADUTHURAI                        | -91 | -83 | 8   | -57  | -38  | 74   | 369  | -100 | -91  | 23   |
| 16 | NAGAPATTINAM                          | -8  | 104 | 26  | -82  | -7   | 11   | 18   | -100 | -99  | -13  |
| 17 | NAMAKKAL                              | -22 | 189 | 182 | 28   | -62  | -36  | 262  | -98  | -80  | -44  |
| 18 | NILGIRI                               | -50 | -28 | 58  | -50  | -89  | -37  | 58   | -100 | -22  | -46  |
| 19 | PERAMBALUR                            | -84 | 59  | 38  | -14  | -49  | -28  | 87   | -99  | -86  | -19  |
| 20 | PUDUKKOTTAI                           | -72 | 40  | 81  | -28  | -92  | -48  | 166  | -99  | -78  | 28   |
| 21 | RAMANATHAPURAM                        | -61 | 99  | 9   | 0    | -50  | 19   | 11   | -100 | -86  | -30  |
| 22 | RANIPET                               | -69 | 197 | -66 | -70  | -25  | -26  | 81   | -85  | -47  | -90  |
| 23 | SALEM                                 | -76 | 92  | 115 | -45  | -76  | -28  | 139  | -98  | -33  | -63  |
| 24 | SIVAGANGA                             | -77 | 100 | 111 | -21  | -90  | 41   | 25   | -100 | -89  | 23   |
| 25 | TENI                                  | -88 | -31 | 237 | -51  | -93  | 26   | 94   | -84  | 101  | 4    |
| 26 | TENKASI                               | -65 | -86 | 25  | -58  | -45  | 25   | 51   | -7   | -48  | -21  |
| 27 | THANJAVUR                             | -41 | 91  | 33  | -14  | -84  | -26  | 78   | -100 | -88  | 50   |

|                                 |                 |     |     |     |     |      |      |      |      |      |      |
|---------------------------------|-----------------|-----|-----|-----|-----|------|------|------|------|------|------|
| 28                              | THIRUVARUR      | -13 | 28  | -1  | -64 | -57  | 2    | 22   | -100 | -90  | 27   |
| 29                              | TIRUCHIRAPPALLI | -66 | 53  | 63  | -4  | -85  | -40  | 80   | -100 | -90  | 6    |
| 30                              | TIRUNELVELI     | -94 | -26 | -15 | -53 | -46  | 7    | 5    | -30  | -71  | 58   |
| 31                              | TIRUPATTUR      | -87 | 99  | 248 | -81 | -69  | -49  | 302  | -98  | -24  | -94  |
| 32                              | TIRUPPUR        | -62 | 108 | 48  | 42  | -89  | -24  | 400  | -99  | -76  | 24   |
| 33                              | TIRUVALLUR      | -64 | 153 | -58 | -57 | 36   | -42  | 112  | -80  | -63  | -94  |
| 34                              | TIRUVANNAMALAI  | -91 | 79  | 48  | -64 | -22  | -30  | 146  | -77  | -28  | -80  |
| 35                              | TUTICORIN       | -86 | -49 | -22 | -37 | 3    | -9   | 3    | -97  | -25  | 2    |
| 36                              | VELLORE         | -85 | 25  | 85  | -65 | -47  | -53  | 3    | -92  | -27  | -85  |
| 37                              | VILLUPURAM      | -90 | 127 | 61  | -84 | -3   | -24  | 146  | -90  | -89  | -72  |
| 38                              | VIRUDHUNAGAR    | -94 | -8  | 85  | -8  | -20  | 48   | 71   | -100 | 23   | -24  |
| STATE : PUDUCHERRY (UT)         |                 |     |     |     |     |      |      |      |      |      |      |
| 1                               | KARAIKAL        | -96 | -41 | -10 | -52 | 15   | -20  | 100  | -100 | -100 | 5    |
| 2                               | PUDUCHERY       | -98 | 32  | 21  | -14 | 2    | -31  | 119  | -90  | -48  | -46  |
| SUBDIVISION : COASTAL KARNATAKA |                 |     |     |     |     |      |      |      |      |      |      |
| STATE : KARNATAKA               |                 |     |     |     |     |      |      |      |      |      |      |
| 1                               | DAKSHIN KANNADA | -51 | -21 | -11 | -23 | -94  | -16  | -44  | -99  | 410  | -93  |
| 2                               | UDUPI           | -67 | -53 | 2   | -52 | -100 | -40  | -67  | -84  | 537  | -94  |
| 3                               | UTTAR KANNADA   | -38 | 34  | 35  | -38 | -100 | -91  | -100 | -96  | 20   | -100 |
| SUBDIVISION : N. I. KARNATAKA   |                 |     |     |     |     |      |      |      |      |      |      |
| 1                               | BAGALKOT        | 2   | 116 | 297 | -21 | -100 | -98  | -100 | -100 | -100 | -100 |
| 2                               | BELGAUM         | -17 | 158 | 191 | 71  | -100 | -100 | -100 | -100 | -4   | -100 |
| 3                               | BIDAR           | -20 | 80  | 266 | 18  | -99  | -100 | -100 | -100 | -100 | -100 |
| 4                               | BIJAPUR         | -16 | 74  | 134 | 27  | -100 | -99  | -100 | -100 | -100 | -100 |
| 5                               | DHARWAD         | 42  | 184 | 55  | 71  | -100 | -100 | -100 | -100 | 126  | -100 |
| 6                               | GADAG           | 141 | 135 | 61  | -61 | -100 | -100 | -100 | -99  | -100 | -100 |
| 7                               | GULBARGA        | -23 | 99  | 122 | 58  | -100 | -100 | -100 | -98  | -41  | -100 |
| 8                               | HAVERI          | 6   | 254 | 89  | 10  | -98  | -95  | -100 | -94  | -38  | -100 |
| 9                               | KOPPAL          | 142 | 166 | 83  | -36 | -100 | -99  | -96  | -65  | -93  | -100 |
| 10                              | RAICHUR         | 71  | 84  | 173 | -58 | -100 | -71  | -100 | -99  | -100 | -100 |
| 11                              | YADGIR          | 19  | 177 | -18 | -46 | -100 | 84   | -100 | -88  | -100 | -100 |
| SUBDIVISION : S. I. KARNATAKA   |                 |     |     |     |     |      |      |      |      |      |      |
| 1                               | BANGALORE RURAL | -41 | 10  | 304 | -27 | -26  | -81  | 89   | -94  | 54   | -100 |
| 2                               | BANGLORE URBAN  | -26 | 8   | 474 | 50  | -44  | -50  | 67   | -92  | 2    | -100 |
| 3                               | BELLARY         | 175 | 156 | 243 | 7   | -99  | -65  | -78  | -22  | -90  | -100 |
| 4                               | CHAMARAJANAGAR  | -56 | 85  | 364 | 27  | -70  | -86  | 159  | -89  | -100 | -91  |
| 5                               | CHIKBALLAPUR    | -9  | 11  | 303 | -59 | -39  | -78  | -33  | -62  | -5   | -100 |
| 6                               | CHIKMAGALUR     | -78 | -33 | 126 | -47 | -100 | -66  | -91  | -65  | 274  | -15  |
| 7                               | CHITRADURGA     | 75  | 84  | 334 | -63 | -98  | 20   | -83  | -66  | -56  | -100 |
| 8                               | DAVANGERE       | 121 | 241 | 222 | -24 | -100 | -57  | -93  | -86  | -33  | -100 |
| 9                               | HASSAN          | -28 | 106 | 412 | 36  | -97  | -41  | -89  | -95  | 268  | -31  |
| 10                              | KODAGU          | -51 | -18 | 107 | 0   | -97  | -57  | -48  | -93  | 140  | -99  |
| 11                              | KOLAR           | -75 | -16 | 398 | -52 | -11  | -70  | 56   | -25  | 44   | -98  |
| 12                              | MANDHYA         | -31 | 28  | 465 | 66  | -26  | -44  | 12   | -91  | 161  | -100 |
| 13                              | MYSORE          | -31 | 129 | 524 | 118 | -96  | -67  | 91   | -80  | 184  | -100 |
| 14                              | RAMNAGAR        | -25 | 10  | 565 | 42  | 41   | -58  | 179  | -16  | 256  | -100 |
| 15                              | SHIMOGA         | -57 | -1  | 53  | -14 | -100 | -63  | -96  | -84  | 148  | -100 |
| 16                              | TUMKUR          | 1   | 61  | 432 | -57 | -92  | -80  | -76  | -72  | -7   | -100 |
| SUBDIVISION : KERALA & MAHE     |                 |     |     |     |     |      |      |      |      |      |      |
| 1                               | ALAPPUZHA       | -45 | -91 | 12  | -20 | -8   | 22   | 53   | -21  | 76   | -25  |
| 2                               | ERNAKULAM       | -43 | -92 | -2  | -24 | -13  | 32   | -6   | -99  | 496  | 222  |
| 3                               | IDUKKI          | -41 | -55 | 136 | 8   | -51  | 37   | 5    | -78  | 168  | -8   |
| 4                               | KANNUR          | -48 | -91 | -67 | -64 | -74  | 56   | -32  | -89  | -13  | -13  |

|    |                              |     |     |     |     |     |     |     |      |     |     |
|----|------------------------------|-----|-----|-----|-----|-----|-----|-----|------|-----|-----|
| 5  | KASARGOD                     | -54 | -84 | -6  | 3   | -89 | 32  | -34 | -100 | 518 | -36 |
| 6  | KOLLAM                       | -51 | -91 | 42  | -40 | -30 | 53  | -25 | -58  | 0   | 0   |
| 7  | KOTTYAM                      | -22 | -79 | 10  | -31 | 0   | 70  | 49  | -80  | 242 | 56  |
| 8  | KOZIKOD                      | -60 | -53 | 30  | -23 | -54 | -21 | 20  | -96  | 176 | -31 |
| 9  | MAHE                         | -75 | -71 | -79 | -81 | -99 | 68  | 146 | -100 | 264 | -50 |
| 10 | MALAPPURAM                   | -83 | -46 | -33 | -21 | -73 | 39  | -19 | -83  | 2   | 104 |
| 11 | PALAKKAD                     | -48 | -41 | -20 | -3  | -91 | -58 | 58  | -82  | 27  | -53 |
| 12 | PATTANAMITTIA                | -36 | -40 | 16  | 19  | -31 | 13  | 80  | 44   | 477 | 228 |
| 13 | THIRUVANANTHPURAM            | -66 | -92 | 213 | -33 | -1  | 7   | -55 | -93  | -75 | 126 |
| 14 | TRISHUR                      | -87 | -93 | -23 | -53 | -59 | -53 | -7  | -95  | 145 | 12  |
| 15 | WAYANAD                      | -54 | 14  | 91  | -53 | -90 | -69 | 22  | -89  | -15 | -86 |
|    | SUBDIVISION :<br>LAKSHADWEEP |     |     |     |     |     |     |     |      |     |     |
| 1  | LAKSHADWEEP                  | -51 | -14 | 82  | -37 | -79 | -85 | 122 | -99  | -78 | 26  |
